# Supplementary material for: Identification and Heterologous Expression of the Albucidin Gene Cluster from the Marine Strain Streptomyces Albus Subsp. Chlorinus NRRL B-24108
Source: PubMed Central journal article supplement (PMC7074753; doi:10.3390/microorganisms8020237), 2020-02-10
Supplement: microorganisms-08-00237-s001.pdf [file microorganisms-08-00237-s001.pdf]

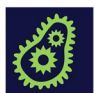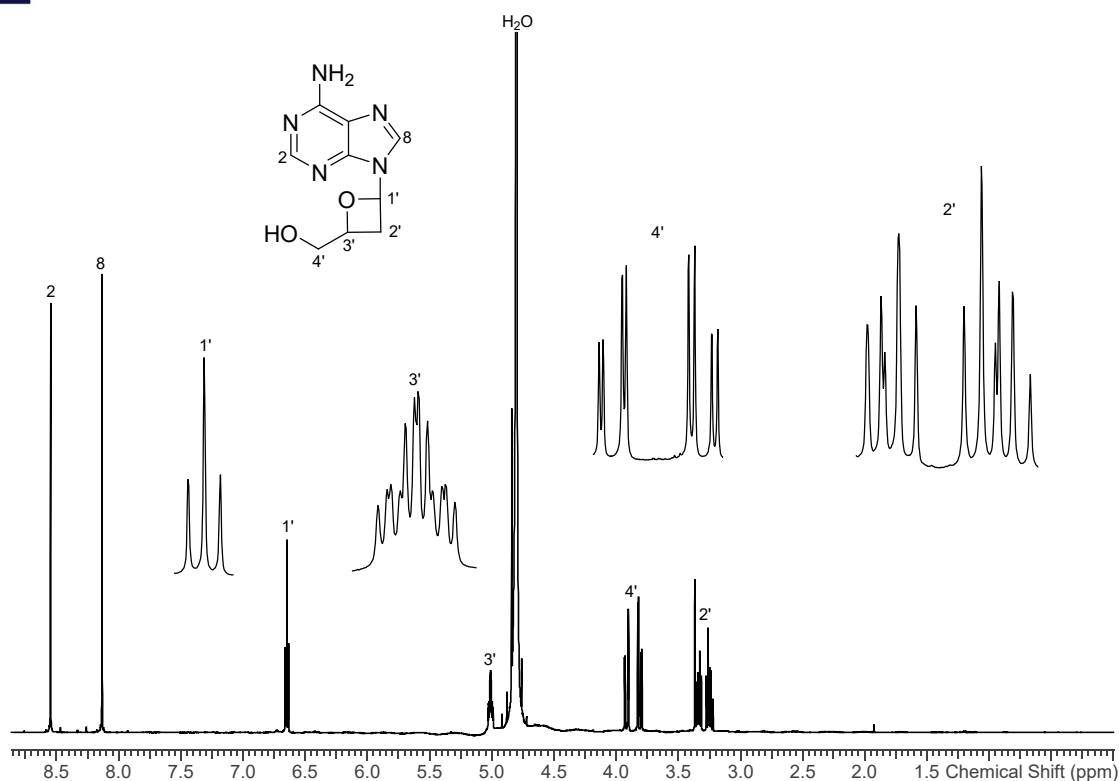

**Figure S1.**  $^1\text{H}$  NMR spectrum of albucidin (500 MHz).  $^1\text{H}$  NMR ( $\text{D}_2\text{O}$ )  $\delta$  8.55 (s, 1H), 8.13 (s, 1H), 6.65 (t,  $J$  = 6.9, 1H), 5.01 (m, 1H), 3.92 (dd,  $J$  = 2.3, 13.5, 1H), 3.81 (dd,  $J$  = 3.5, 13.5, 1H), 3.33 (m, 1H), 3.25 (m, 1H).

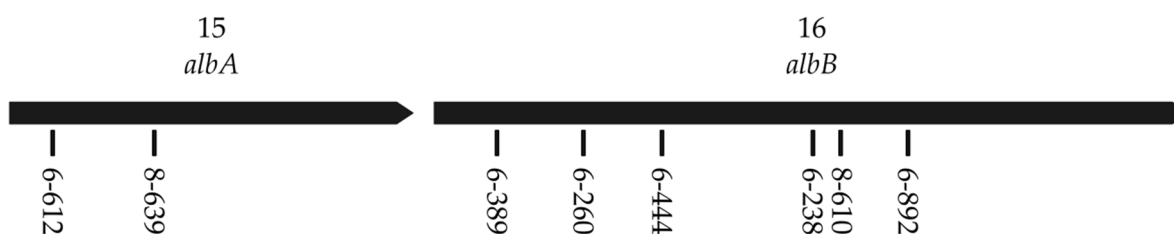

**Figure S2.** The genes *albA* and *albB* with the mapped point mutations identified in the course of NTG-mutagenesis. The positions of the mutations are shown as vertical lines. The mutant 6-612 contains a transition mutation G→A in the position 133 of *albA*. The mutant 8-639 contains a transition mutation G→A in the position 431 of *albA*. The mutant 6-389 contains a transition mutation G→A in the position 190 of *albB*. The mutant 6-260 contains a transition mutation G→A in the position 445 of *albB*. The mutant 6-444 contains a transition mutation G→A in the position 677 of *albB*. The mutant 6-238 contains a transition mutation G→A in the position 1118 of *albB*. The mutant 8-610 contains a transition mutation C→T in the position 1205 of *albB*. The mutant 6-892 contains a transition mutation G→A in the position 1403 of *albB*.

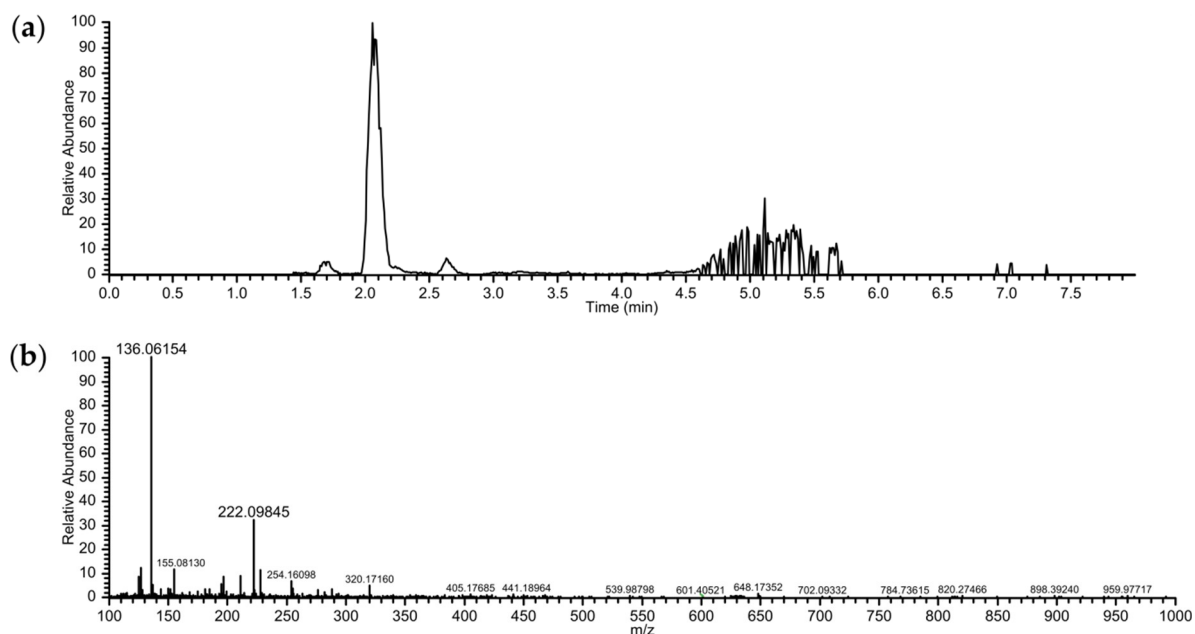

**Figure S3.** High resolution HPLC-MS analysis of albucidin production by *Streptomyces albus* 1K1. (a) Extracted ion chromatogram ( $222.00 \pm 0.15$  Da) of crude extract from *S. albus* 1K1. (b) High resolution mass spectrum of the peak corresponding to albucidin at  $t_R = 2.1$  min.

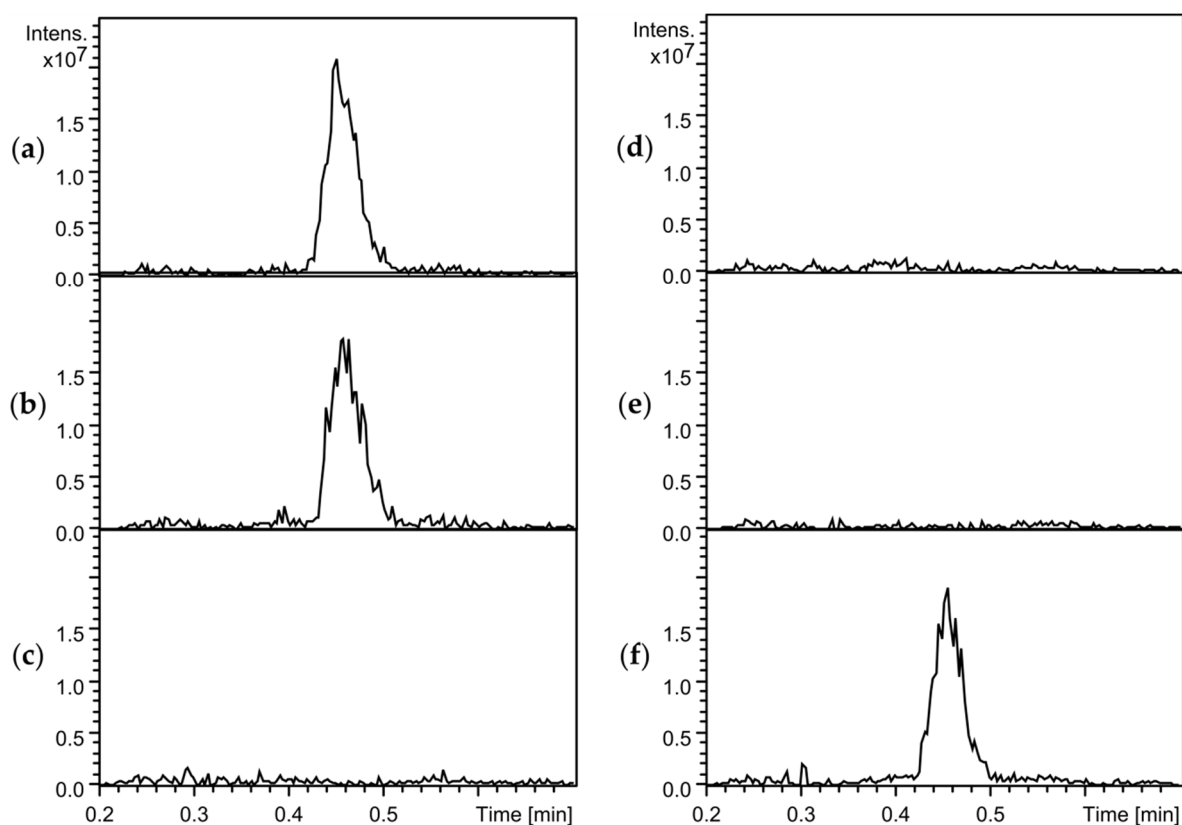

**Figure S4.** HPLC-MS analysis of albucidin production by *Streptomyces albus* strain harboring 1K1 BAC and its derivatives with gene deletions. Extracted chromatograms ( $222.00 \pm 0.5$  Da) of crude extracts from *S. albus* 1K1 (a), *S. albus* 1K1\_KO14 (b), *S. albus* 1K1\_KO15 (c), *S. albus* 1K1\_KO16 (d), *S. albus* 1K1\_LS (e), *S. albus* 1K1\_RS (f) are shown.

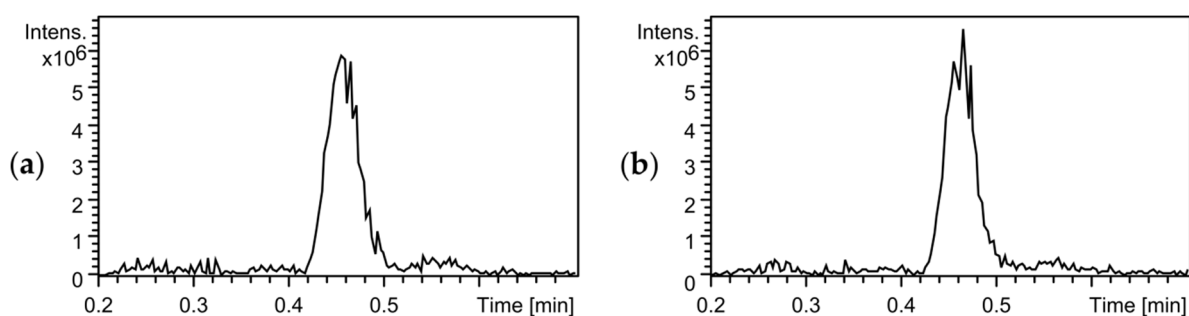

**Figure S5.** HPLC-MS analysis of albucidin production by *Streptomyces albus* 1K1 BAC (a) and *Streptomyces albus* 2D4 BAC (b). Extracted chromatograms ( $222.00 \pm 0.5$  Da) of crude extracts are shown.

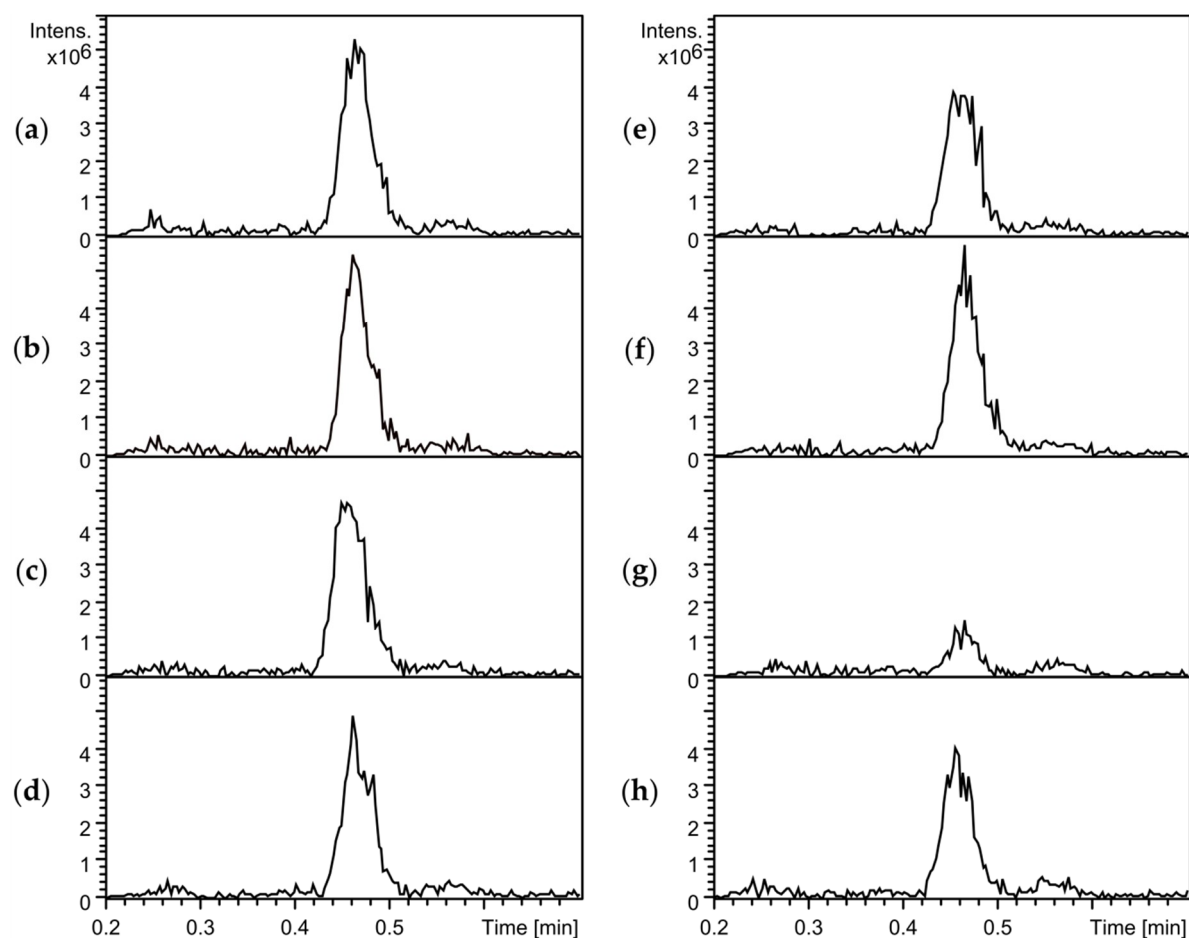

**Figure S6.** HPLC-MS analysis of albucidin production by *Streptomyces albus* strain harboring 1K1 BAC and its derivatives with gene deletions. Extracted chromatograms ( $222.00 \pm 0.5$  Da) of crude extracts from *S. albus* 1K1 (a), *S. albus* 1K1\_KO7 (b), *S. albus* 1K1\_KO8 (c), *S. albus* 1K1\_KO9 (d), *S. albus* 1K1\_KO10 (e), *S. albus* 1K1\_KO11 (f), *S. albus* 1K1\_KO12 (g), *S. albus* 1K1\_KO13 (h).

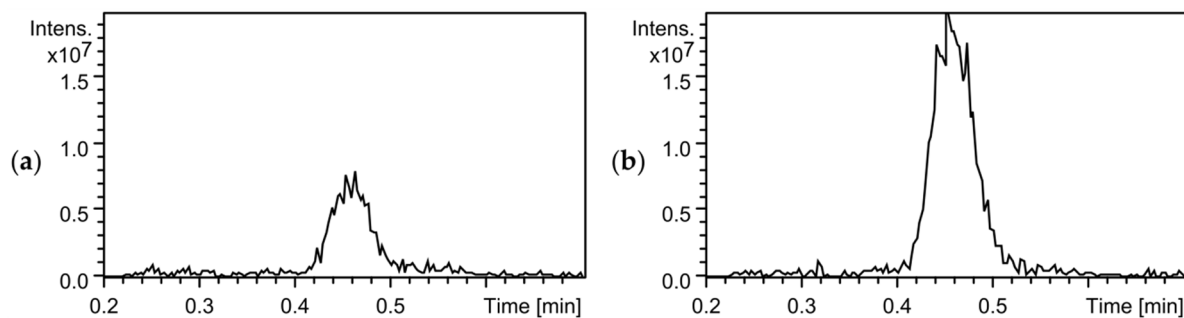

**Figure S7.** HPLC-MS analysis of albucidin production by *Streptomyces albus* strain harboring full length 1K1 BAC (a) and minimized 1K1\_alb\_act BAC, containing only transcriptionally activated *albA-C* operon (b). Extracted chromatograms ( $222.00 \pm 0.5$  Da) are shown.

**Table S1.** Bacterial strains used in the study.

| Strain                                 | Description                               | Source |
|----------------------------------------|-------------------------------------------|--------|
| <i>Streptomyces albus</i> Del14        | Cluster-free heterologous host strain     | [19]   |
| <i>Streptomyces lividans</i> TK24      | Heterologous host strain                  | [20]   |
| <i>Escherichia coli</i> GD10B          | General coning host                       | [26]   |
| <i>Escherichia coli</i> ET12567 pUB307 | Donor strain for intergeneric conjugation | [27]   |

**Table 2.** Plasmids and BACs used in the study.

| Plasmid/BAC | Description                                                                                                                    | Source            |
|-------------|--------------------------------------------------------------------------------------------------------------------------------|-------------------|
| pUC19       | Plasmid; General cloning vector; Used as a source of ampicillin resistance marker for RedET experiments                        | Thermo scientific |
| pACS-hyg    | Plasmid; Contains promoter activation cassette; Used as a source of hygromycin resistance gene for RedET experiments           | [16]              |
| 1K1         | BAC; Contains albucidin cluster                                                                                                | [14]              |
| 2D4         | BAC; Contains albucidin cluster                                                                                                | [14]              |
| 1K1_RS      | Derivative of 1K1; contains substitution of the genes 17 – 28 (SACHL2_05523 - SACHL2_05512) with hygromycin resistance gene    | This study        |
| 1K1_LS      | Derivative of 1K1; contains substitution of the genes 1 – 13 (SACHL2_05539 - SACHL2_05527) with ampicillin resistance gene     | This study        |
| 1K1_KO7     | Derivative of 1K1; contains substitution of the gene 7 (SACHL2_05533) with ampicillin resistance gene                          | This study        |
| 1K1_KO8     | Derivative of 1K1; contains substitution of the gene 8 (SACHL2_05532) with ampicillin resistance gene                          | This study        |
| 1K1_KO9     | Derivative of 1K1; contains substitution of the gene 9 (SACHL2_05531) with ampicillin resistance gene                          | This study        |
| 1K1_KO10    | Derivative of 1K1; contains substitution of the gene 10 (SACHL2_05530) with ampicillin resistance gene                         | This study        |
| 1K1_KO11    | Derivative of 1K1; contains substitution of the gene 11 (SACHL2_05529) with ampicillin resistance gene                         | This study        |
| 1K1_KO12    | Derivative of 1K1; contains substitution of the gene 12 (SACHL2_05528) with ampicillin resistance gene                         | This study        |
| 1K1_KO13    | Derivative of 1K1; contains substitution of the gene 13 (SACHL2_05527) with ampicillin resistance gene                         | This study        |
| 1K1_KO14    | Derivative of 1K1; contains substitution of the gene 14 (SACHL2_05526) with ampicillin resistance gene                         | This study        |
| 1K1_KO15    | Derivative of 1K1; contains substitution of the gene 15 (SACHL2_05525) with ampicillin resistance gene                         | This study        |
| 1K1_KO16    | Derivative of 1K1; contains substitution of the gene 16 (SACHL2_05524) with ampicillin resistance gene                         | This study        |
| 1K1_RS2     | Derivative of 1K1; contains substitution of the genes 17 – 28 (SACHL2_05523 - SACHL2_05512) with ampicillin resistance gene    | This study        |
| 1K1_alb_act | Derivative of 1K1_RS2; contains substitution of the genes 1 – 14 (SACHL2_05539 - SACHL2_05526) with hygromycin resistance gene | This study        |

<sup>1</sup> The locus tags refer to the genome sequence of *S. albus* subsp. *chlorinus* NRRL B-24108 available under GenBank accession number VJOK00000000.

**Table 3.** Primers used in this study.

| Primer | Sequence                                               |
|--------|--------------------------------------------------------|
| LS-F   | TCACGTCGATATCGGCAGCGGGTGGATCTCCTGCGCGGGGTGCCCGGCGCCGTC |

---

AGGTGGCACTTTTCG

LS-R GAGGCCGTGCGTCCGGGATCGAGGCGGACCAGGCCGGAGGCGTACAGCGGAAG  
CTTTTACCAATGCTTAATCAGTG

RS-F ATGACAGGACTCGGAAGTAGTGGACCGACGTTCCGGCTCGATGAGGAGTTTCTA  
GAAATACTTGACATATCACTGT

RS-R TCACCGGCCGGTCTGTGAGCGAGGTTCCGAACAGCCAGCTCGCGCAGCATCAG  
GCGCCGGGGGCGGTGT

KO14-F ATGAGCCCGTCAACCGCCGGGGTTCGACGCCCGCCGCTACACATGGTGCTGGTTT  
AAACCGTCAGGTGGCACTTTTCG

KO14-R TCAGGCCCGGACGCCGGCCGTCTCCCTCGACATCGGGCAGGTAGTCCCAAGC  
TTGTTTAAACTTACCAATGCTTAATCAGTG

KO15-F ATGACGCTCTTATCCACCGAGCTTGACGCCACGGCGGCCCTGCGGCTCAAGTTTA  
AACCGTCAGGTGGCACTTTTCG

KO15-R TCATGCGGGCAGGCGGGAGAACAACCCAGGTAGGCTTCCGTGTTCGATCGAAGC  
TTGTTTAAACTTACCAATGCTTAATCAGTG

KO16-F ATGTCCCGGTTGAGGCCGATGTGCGCACGTTGGAGGACAGGCTCAGCAGGTTT  
AAACCGTCAGGTGGCACTTTTCG

KO16-R CTATTCGGCGACGCACTGCTCGGGCGGATTGATCAGCGTCCAGTCCGTTCAAGCT  
TGTTTAAACTTACCAATGCTTAATCAGTG

KO13-F ATGCAAGGAGTGACTCTCGGCACCAAGTCCCTTGACCGAAAAAGCGTGGAGTTT  
AAACCGTCAGGTGGCACTTTTCG

KO13-R TCATGAGGCCGTGCGTCCGGGATCGAGGCGGACCAGGCCGGAGGCGTACAAAG  
CTTGTTTAAACTTACCAATGCTTAATCAGTG

KO12-F GCGGAAAACCGTCTCTTCCCTGGATATCGACTGGCGCGAGGGCGGTTACCCAAGC  
TTGTTTAAACCGTCAGGTGGCACTTTTCG

KO12-R TCAGAACAACGAGGGCTGGACGGCGCCGACCTCGGACGTGTAGTCACCCAGTTT  
AAACTTACCAATGCTTAATCAGTG

KO11-F ATGGCCGAATTCAGCTTGTCACTCGACGGTTCTCTGGCGAATTCCCGCGAGTTTA  
AACCGTCAGGTGGCACTTTTCG

KO11-R CCCGGTCTCGCTTTCGCGGTCCAGCCCCAGCAGATCGAGCAGCTCCTGGTAAGCT  
TGTTTAAACTTACCAATGCTTAATCAGTG

KO10-F ATGTTGATCGCGTTCGAGGGAATCGACGGCGCCGGAAAGACCACGGCCGTAAG  
CTTGTTTAAACCGTCAGGTGGCACTTTTCG

KO10-R TCATCGATCGGTCAGAAAGCCGTCCACCAGCGCCGCGACCTCGTCCGCCAGTTT  
AAACTTACCAATGCTTAATCAGTG

KO9-F TTGGAGACACAGGCCAGCGACACGATCGAAGAATTCGACGTCGACCCCGAAAG  
CTTGTTTAAACCGTCAGGTGGCACTTTTCG

KO9-R TCACCGGAGGGGGCGTACGGAACCGTCCATGGTGACGCGTATGTGGTGTTT  
AAACTTACCAATGCTTAATCAGTG

KO8-F GTGACGCCCCCTCCGGTGAGAGCGGGACCAGGCACGCGGCCCTTGAGCGAAG  
CTTGTTTAAACCGTCAGGTGGCACTTTTCG

---

---

|       |                                                                                         |
|-------|-----------------------------------------------------------------------------------------|
| KO8-R | TCAGGTGCCAGCGCACAGGAACTCCTCCCATCGACGTACGTGAAGCGTCAGTTT<br>AAACTTACCAATGCTTAATCAGTG      |
| KO7-F | GTGCGCTGGCACCTGACCGGCATCACCGGTAAGTGCGTCCACCCGGGTTAAGC<br>TTGTTTAAACCGTCAGGTGGCACTTTTCG  |
| KO7-R | CAGCTCGCTCCAGTGGGCGGAGAGGAGTTCGGAGGGGTCGGTCAGGTGGTGTTT<br>AAACTTACCAATGCTTAATCAGTG      |
| RS2-F | ATGACCGGTCAACCGGCGAGCGGGGAGCTCGACATGGTGCGCAGCGCCGTTCTA<br>GACGTCAGGTGGCACTTTTCG         |
| RS2-R | TCACCGGCCGGTCGTGTGAGCGAGGTTCCGAACAGCCAGCTCGCGCAGCAAAGC<br>TTGTTTAAACTTACCAATGCTTAATCAGT |
| ACT-F | TCACGTCGATATCGGCAGCGGGTGGATCTCCTGCGCGGGGTGCCCGGCGCATTTA<br>AATAATACTTGACATATCACTGT      |
| ACT-R | TCGGTGGATAAGAGCGTCATACTCCGTCCTTCGTCTGCGGTTTGAGCCCATCAGG<br>CGCCGGGGGCGGTGT              |

---
